# Supplementary material for: Several steps of lateral gene transfer followed by events of ‘birth-and-death’ evolution shaped a fungal sorbicillinoid biosynthetic gene cluster
Source: PubMed Central journal article supplement (PMC5182515; doi:10.1186/s12862-016-0834-6), 2016-12-07

Additional file 2: Figure S2

**A**

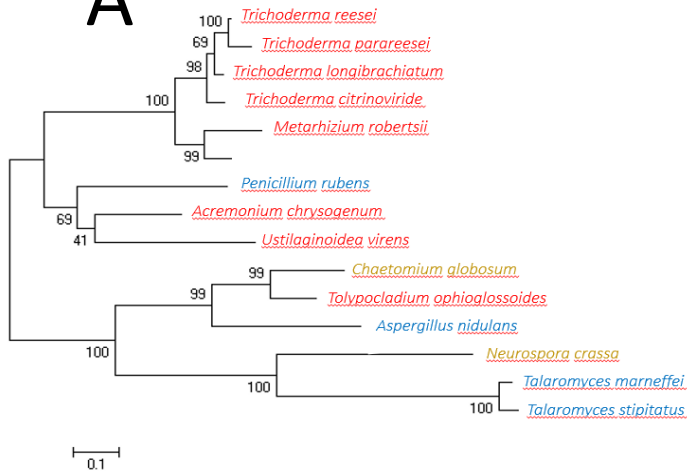

**B**

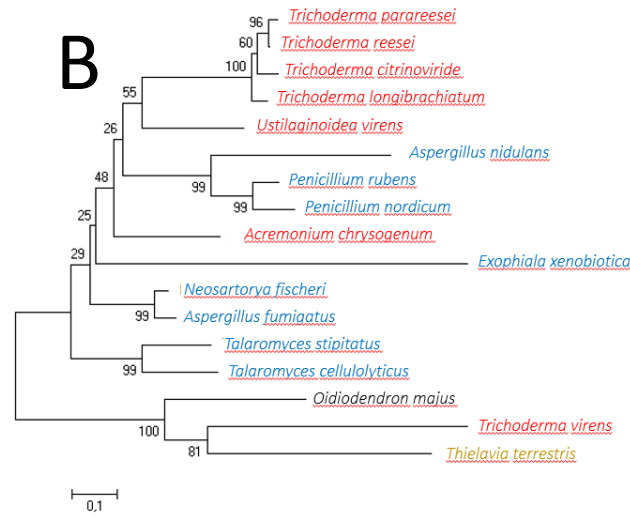

**C**

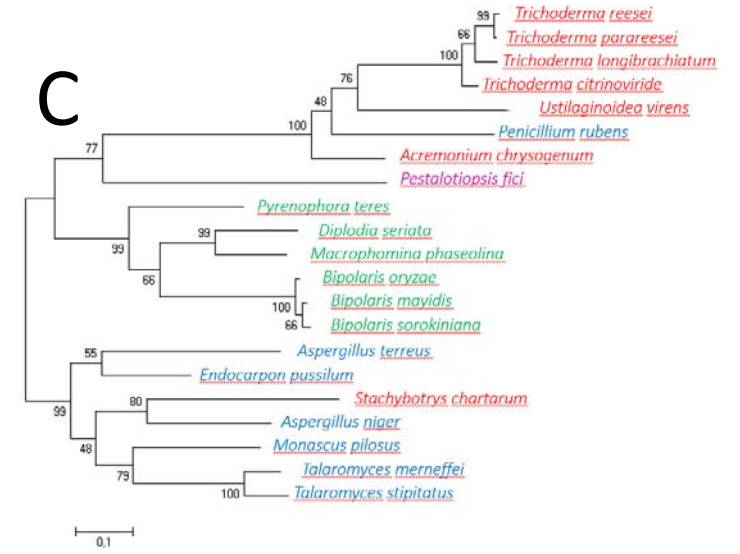

**D**

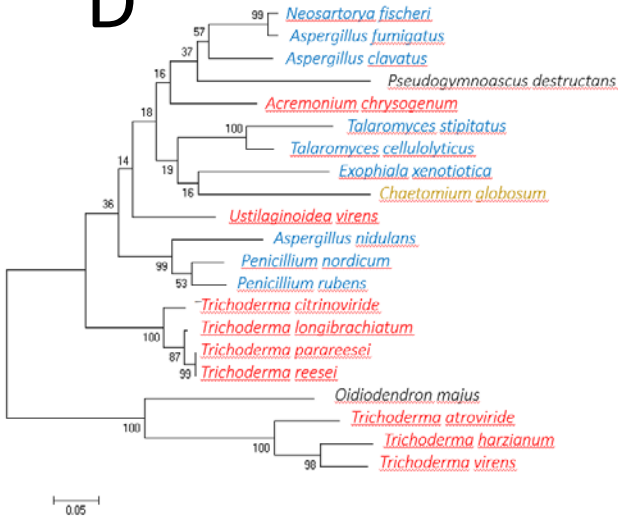

**E**

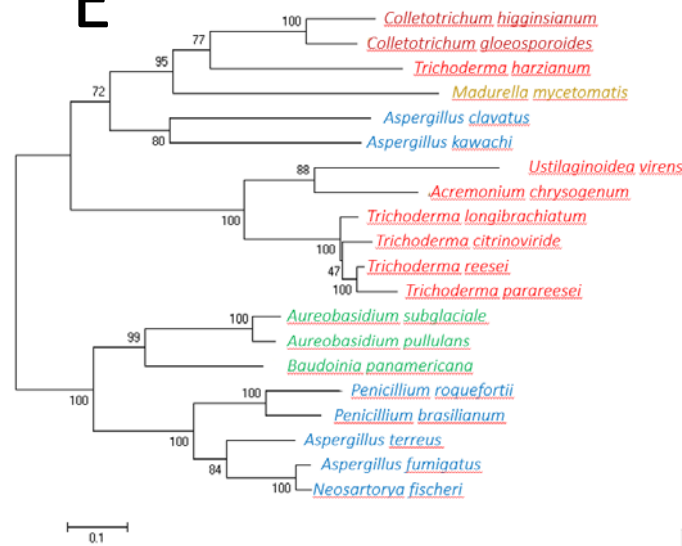

**F**

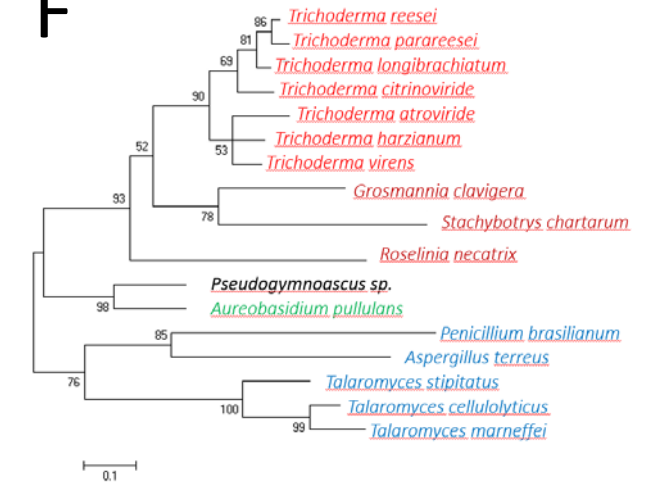

Supplement: 12862_2016_834_MOESM2_ESM.pdf [file 12862_2016_834_MOESM2_ESM.pdf]
