# Supplementary material for: Several steps of lateral gene transfer followed by events of ‘birth-and-death’ evolution shaped a fungal sorbicillinoid biosynthetic gene cluster
Source: PubMed Central journal article supplement (PMC5182515; doi:10.1186/s12862-016-0834-6), 2016-12-07

# SOR1

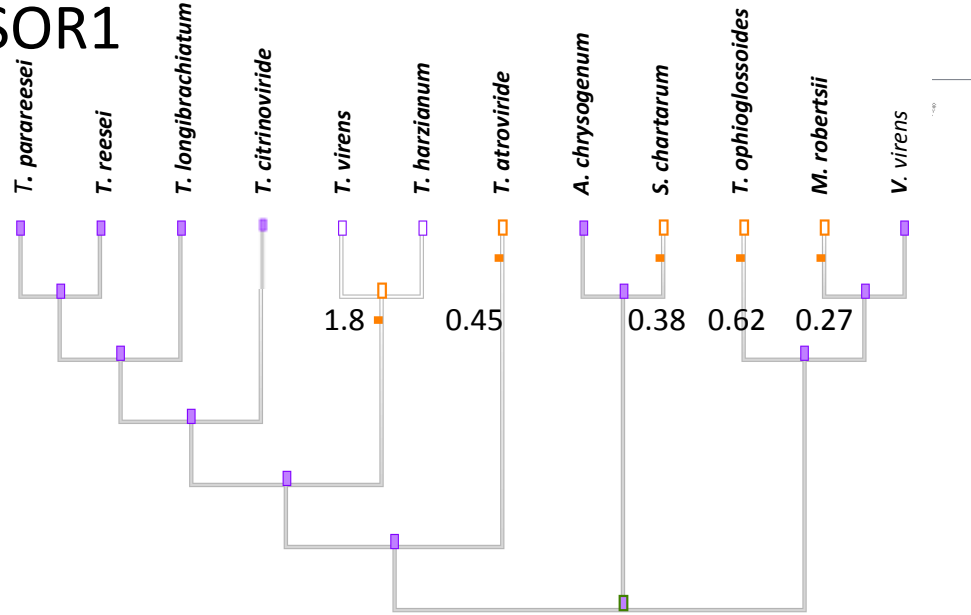

# SOR2

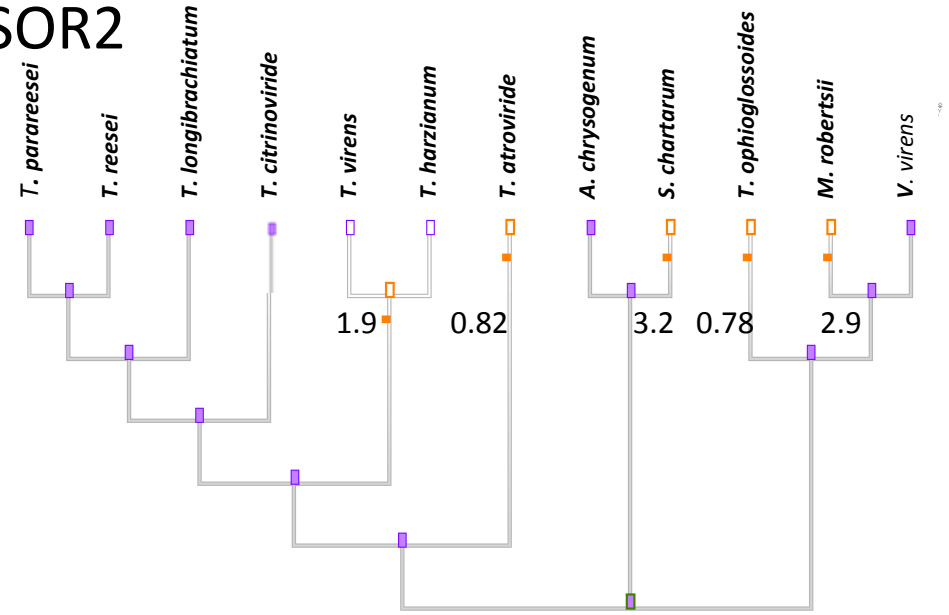

# SOR3

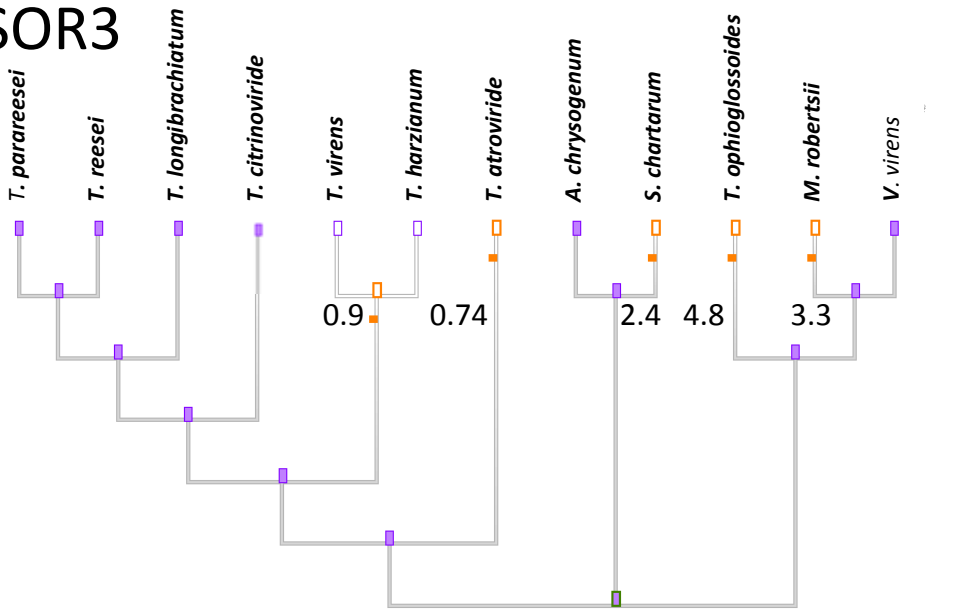

# SOR4

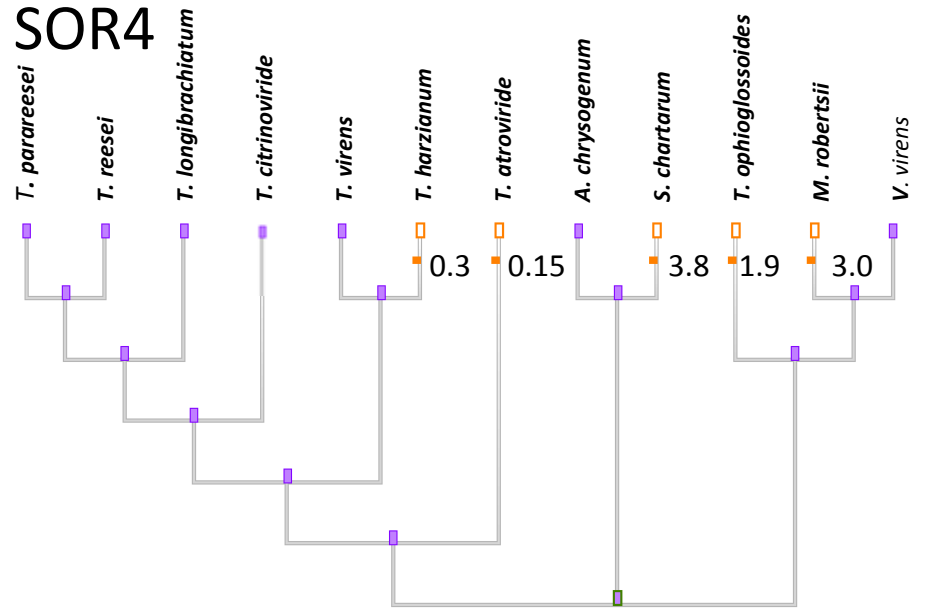

# SOR5

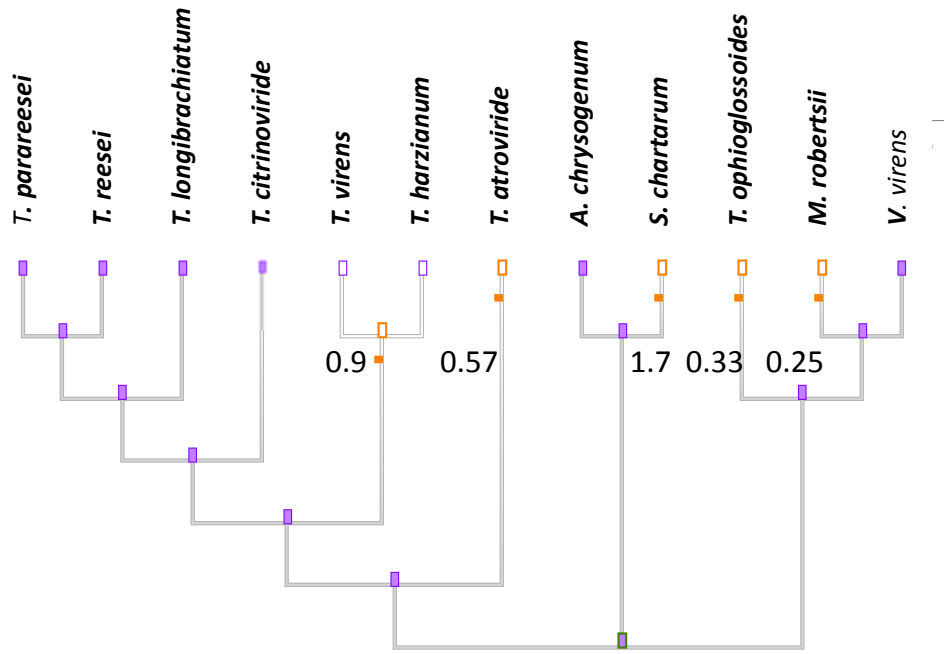

# SOR6

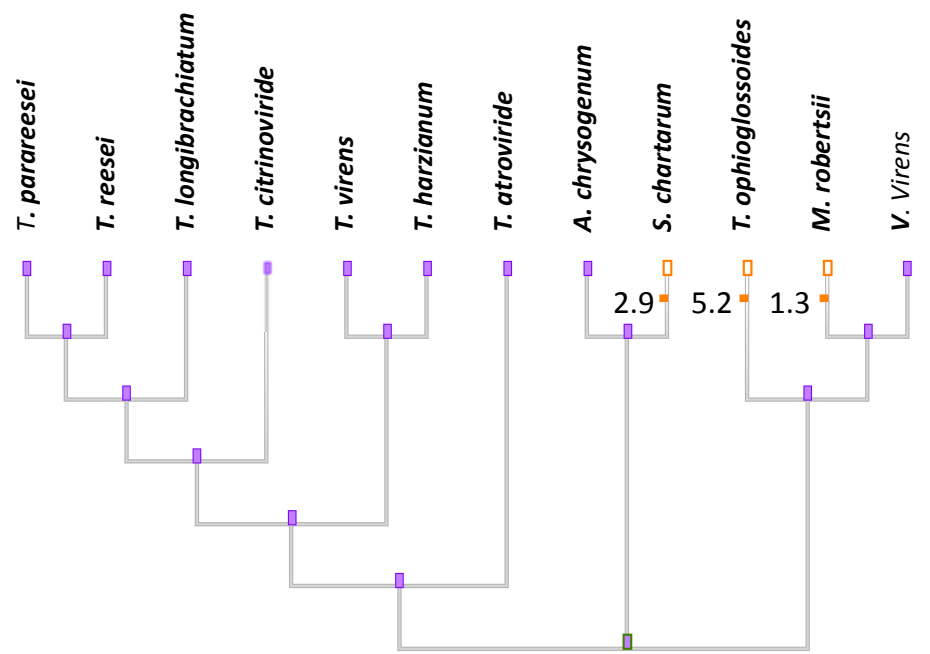

Supplement: 12862_2016_834_MOESM6_ESM.pdf [file 12862_2016_834_MOESM6_ESM.pdf]
